# Supplementary material for: APPRAISE-AI Tool for Quantitative Evaluation of AI Studies for Clinical Decision Support
Source: PubMed Central journal article supplement (PMC10520738; doi:10.1001/jamanetworkopen.2023.35377), 2023-09-25
Supplement: jamanetwopen-e2335377-s002.pdf [file jamanetwopen-e2335377-s002.pdf]

## Data Sharing Statement

Kwong. APPRAISE-AI Tool for Quantitative Evaluation of AI Studies for Clinical Decision Support. *JAMA Netw Open*. Published September 25, 2023.

doi:10.1001/jamanetworkopen.2023.35377

### Data

**Data available:** Yes

**Data types:** Data (not involving human participants)

**How to access data:** <https://doi.org/10.5281/zenodo.7930888>

**When available:** With publication

### Supporting Documents

**Document types:** None

### Additional Information

**Who can access the data:** Publicly available

**Types of analyses:** For any purpose

**Mechanisms of data availability:** Publicly available
